# Supplementary material for: Hyperosmolarity impedes the cross-priming competence of dendritic cells in a TRIF-dependent manner
Source: PubMed Central journal article supplement (PMC5428499; doi:10.1038/s41598-017-00434-y), 2017-03-22
Supplement: 41598_2017_434_MOESM1_ESM.pdf [file 41598_2017_434_MOESM1_ESM.pdf]

# **Hyperosmolarity impedes the cross-priming competence of dendritic cells in a TRIF-dependent manner**

Zoran V. Popovic\*<sup>¶</sup>, Maria Embgenbroich<sup>#</sup>, Federica Chessa<sup>\*</sup>, Viola Nordström<sup>\*</sup>, Mahnaz Bonrouhi<sup>\*</sup>, Thomas Hielscher<sup>§</sup>, Norbert Gretz<sup>±</sup>, Shijun Wang<sup>\*</sup>, Daniel Mathow<sup>\*</sup>, Thomas Quast<sup>\*\*</sup>, Jan-Gero Schloetel<sup>\*\*\*</sup>, Waldemar Kolanus<sup>\*\*</sup>, Sven Burgdorf<sup>#1</sup> and Hermann-Josef Gröne<sup>\*1</sup>

**Running headline:** High salt hinders cross-priming

\* Department of Cellular and Molecular Pathology and <sup>§</sup> Department of Biostatistics, German Cancer Research Center, Heidelberg, Germany; <sup>¶</sup> Institute of Pathology and <sup>±</sup> Medical Research Center, University Hospital Mannheim, University of Heidelberg, Mannheim, Germany; <sup>#</sup> Department of Cellular Immunology, <sup>\*\*</sup> Department of Molecular Immunology and Cell Biology and <sup>\*\*\*</sup> Department of Membrane Biochemistry, LIMES Institute, University of Bonn, Bonn, Germany.

<sup>1</sup> Co-senior authors

## SUPPLEMENTARY INFORMATION

### SUPPLEMENTARY FIGURE LEGENDS

**Supplementary figure 1. The effect of hypertonic micromilieu on CD8<sup>+</sup> T cell activation can be observed independent of the concentration of antigen or LPS stimuli and is not regulated by NFAT5.** **a)** BMDCs raised in isotonic or hypersomotic conditions (290 mOsm, 370 mOsm and 450 mOsm) were incubated with OVA grade VII (0.2, 0.5, 1 mg/mL) without or with LPS (10 ng/mL) for 4 hours followed by overnight (17 hours) co-incubation with OTI cells. **b)** BMDCs exposed to different osmolarities were incubated with ET-free OVA (1 mg/mL; left graph) or OVA grade VII (1 mg/mL; right graph) without or with different LPS concentrations (10 ng/mL, 100 ng/mL, 200 ng/mL) for 4 hours, followed by overnight co-incubation with OTI cells (n=3). **c)** BMDCs were developed in isotonic or mannitol-enriched (450 mOsm) medium and applied in an OVA/OTI-activation assay, as described (n=4). **d)** BMDCs derived from bone marrows of NFAT5<sup>-/-</sup> mice were developed in isotonic or NaCl-hypertonic conditions and used in the cross-priming OVA /OTI assay as previously described (n=4). Statistical data are expressed as mean ± SEM (\*p<0.05, \*\*p<0.01 and \*\*\*p<0.001).

**Supplementary figure 2. Hyperosmolarity in a pathophysiological range (370 – 450 mOsm) does not influence BMDC viability. BMDCs developed in a moderately**

**hyperosmolar (340 mOsm) medium show reduced cross-priming capacity as well.** **a)**

Electron photomicrographs of BMDCs matured in 290 mOsm – 450 mOsm conditions, endotoxin-free (upper lane) or upon LPS stimulation (lower lane). No morphologic hallmarks of cell death can be observed. The cells represent 20 randomly selected areas per condition (scale bars = 2500 nm). **b)** BMDCs from C57BL/6 mice were prepared for the cross-presentation assay as indicated in Fig. 2. Statistical graph showing IFN- $\gamma$  secretion from OTI

cells cross-primed by BMDCs raised in isotonic, moderately NaCl-hypertonic (340 mOsm) and high NaCl (450 mOsm) medium, with or without LPS (100 ng/mL) stimulation. Statistical data are expressed as mean  $\pm$  SEM and are representative of minimum two independent experiments (\* $p \leq 0.05$ , \*\* $p \leq 0.01$ , \*\*\* $p \leq 0.001$ ;  $n=4$ ).

**Supplementary figure 3. Analysis of intraendosomal pH in BMDCs matured in hypertonic microenvironment and analysis of MIP-2 secretion by BMDCs from different osmolarities.** **a)** Histogram plots (left) and statistical graphs (right) showing LysoSens green DND-189 mean fluorescence intensity by BMDCs of WT C57BL/6 origin, developed in NaCl hypertonic conditions as indicated. Statistical data are expressed as mean  $\pm$  SEM ( $n=3$ ). **b)** BMDCs matured in isotonic and hypertonic medium were plated at  $0.1 \times 10^6$ /well in 96-well plates for 6 hours in 100  $\mu$ l of medium without (290 mOsm) or with corresponding NaCl concentration (to reach final 370 mOsm or 450 mOsm), without or with (100 ng/mL) LPS. After 24 hours of incubation at standard cell culture conditions, the supernatants were collected and analyzed for MIP-2 by ELISA. Data are presented as mean  $\pm$  SEM (\*\* $p \leq 0.01$ , \*\*\* $p \leq 0.001$ ;  $n=4$ ).

**Supplementary figure 4 . Assessment of duration of DC-T cell contact upon exposure of BMDCs to hypertonic conditions.** CFSE-labeled OTI T cells were cultured with FarRed-labeled OVA-loaded wildtype BMDCs generated with different osmolarities. The interaction time between T cells and DCs was monitored by time-lapse microscopy (Supplementary movie – exemplary movie documentation) for around 15 randomly chosen cells. Statistical data are expressed as mean  $\pm$  SEM and are representative of two independent experiments ( $n=21$ ).

**Supplementary figure 5. TRIF mediates cortical vs. medullary (osmolarity gradient) orientation of infiltrating T lymphocytes during acute renal allograft rejection.**

**a)** Photomicrographs of murine zinc-fixed kidney allograft tissue undergoing acute rejection (day 7 post-transplantation) immunostained for CD3 molecule. (Magnification x400, scale bar indicates 20  $\mu$ M). **b)** Distribution of CD3<sup>+</sup> cells in cortex and medulla of donor kidneys (BALB/c) 7 days post-allotransplantation to WT, TRIF<sup>lps2/lps2</sup> or MyD88<sup>-/-</sup> mice (in C57BL76 background). CD3-positive cells were counted from three high power fields (x40 objective) per kidney from both cortex and outer medulla (\*\*\*p $\leq$ 0.001, \*\*p $\leq$ 0.01, n=5 mice).

**Supplementary figure 6. Transcriptional profiling of BMDCs from WT and TRIF<sup>lps2/lps2</sup> mice developed under isotonic and hypertonic conditions.** Heat map demonstrates differential gene expression of members of *MHC class I-mediated antigen processing and presentation pathway* (REACTOME) upon exposure to hyperosmolar microenvironment, from WT **(a)** or TRIF<sup>lps2/lps2</sup> **(b)** mice. 290 or 450 = BMDCs differentiated in 290 mOsm or 450 mOsm medium, respectively (n=4).

**Supplementary table 1: Genes differentially regulated in BMDCs matured in 450 mOsmol/L vs. 290 mOsmol/L medium (cutoff of genes involved in 'Class I MHC Mediated Antigen Processing and Presentation').** Positive logFC values indicate upregulation (red background) and negative values show downregulation (blue background) of gene expression in BMDCs raised in hyperosmolar medium (450 mOsmol/L); **a)** from WT mice (cutoff of significantly altered genes with p value  $\leq$  0.05; n=4). **b)** Genes differentially regulated in BMDCs from isotonic and hypertonic medium, with no overlap between WT and TRIF-deficient groups (n=4).

**Supplementary movie – exemplary movie documentation: Interaction between OTI cells and OVA-loaded BMDCs.** The interaction time between OTI cells (CFSE-labeled; green) and BMDCs (FarRed-labeled; red) was monitored by time-lapse microscopy for around 15 randomly chosen cells in both normosmolar and hyperosmolar (450 mOsm) group. Statistical data (Supplementary figure 3) are expressed as mean  $\pm$  SEM and are representative of two independent experiments (n=21).

## **SUPPLEMENTARY EXPERIMENTAL PROCEDURES**

**Transmission electron microscopy.** BMDCs developed in 290 mOsm, 370 mOsm and 450 mOsm conditions were cultured on sterile glass cover slips for 17 hours, incubated with 1 mg/mL OVA for 2 hours and washed by PBS. Transmission electron microscopy was performed as described <sup>1</sup>.

**Analysis of DC / T cell interaction time by time-lapse microscopy.** FarRed-labeled BMDCs and CFSE-labeled OTI cells were mixed at a ratio of 1:4 and subsequently were placed in plastic channel slides ( $\mu$ -slide; ibidi, Planegg / Martinsried, Germany) coated with 5.0  $\mu$ g/mL ICAM-1/FC (R&D Systems, Wiesbaden, Germany) following incubation with 12.0  $\mu$ g/mL goat anti-human IgG antibody (Dianova). Analysis of DC / T cell interaction time was carried out as described previously by the use of time-lapse video microscopy <sup>2</sup>.

**Renal transplantation.** Transplantation of BALBc donor kidneys to WT, TRIF<sup>tlr2/tlr2</sup> and MyD88<sup>-/-</sup> mice (C57BL/6 background) was performed as described<sup>3,4</sup>. Mice were sacrificed on day 7 post-transplantation (n=5/group). Analyses of different parameters from the same sections were previously published<sup>3</sup>, without interfering with our topic here.

**Bioinformatic analyses.** Preprocessing and analysis of gene expression values including pathway analysis was performed as described previously <sup>5,6</sup>.

## SUPPLEMENTARY REFERENCES

1. Mathow, D. *et al.* Zeb1 affects epithelial cell adhesion by diverting glycosphingolipid metabolism. *EMBO reports* 16, 321-331 (2015).
2. Semmling, V. *et al.* Alternative cross-priming through CCL17-CCR4-mediated attraction of CTLs toward NKT cell-licensed DCs. *Nature immunology* 11, 313-320 (2010).
3. Wang, S. *et al.* Recipient Toll-like receptors contribute to chronic graft dysfunction by both MyD88- and TRIF-dependent signaling. *Disease models & mechanisms* 3, 92-103 (2010).
4. Zhang, Z. *et al.* Improved techniques for kidney transplantation in mice. *Microsurgery* 16, 103-109 (1995).
5. Chessa, F., Hielscher, T., Mathow, D., Grone, H.J. & Popovic, Z.V. Transcriptional profiling of dendritic cells matured in different osmolarities. *Genomics data* 7, 64-66 (2015).
6. Chessa, F. *et al.* The renal microenvironment modifies dendritic cell phenotype. *Kidney international* (2015).

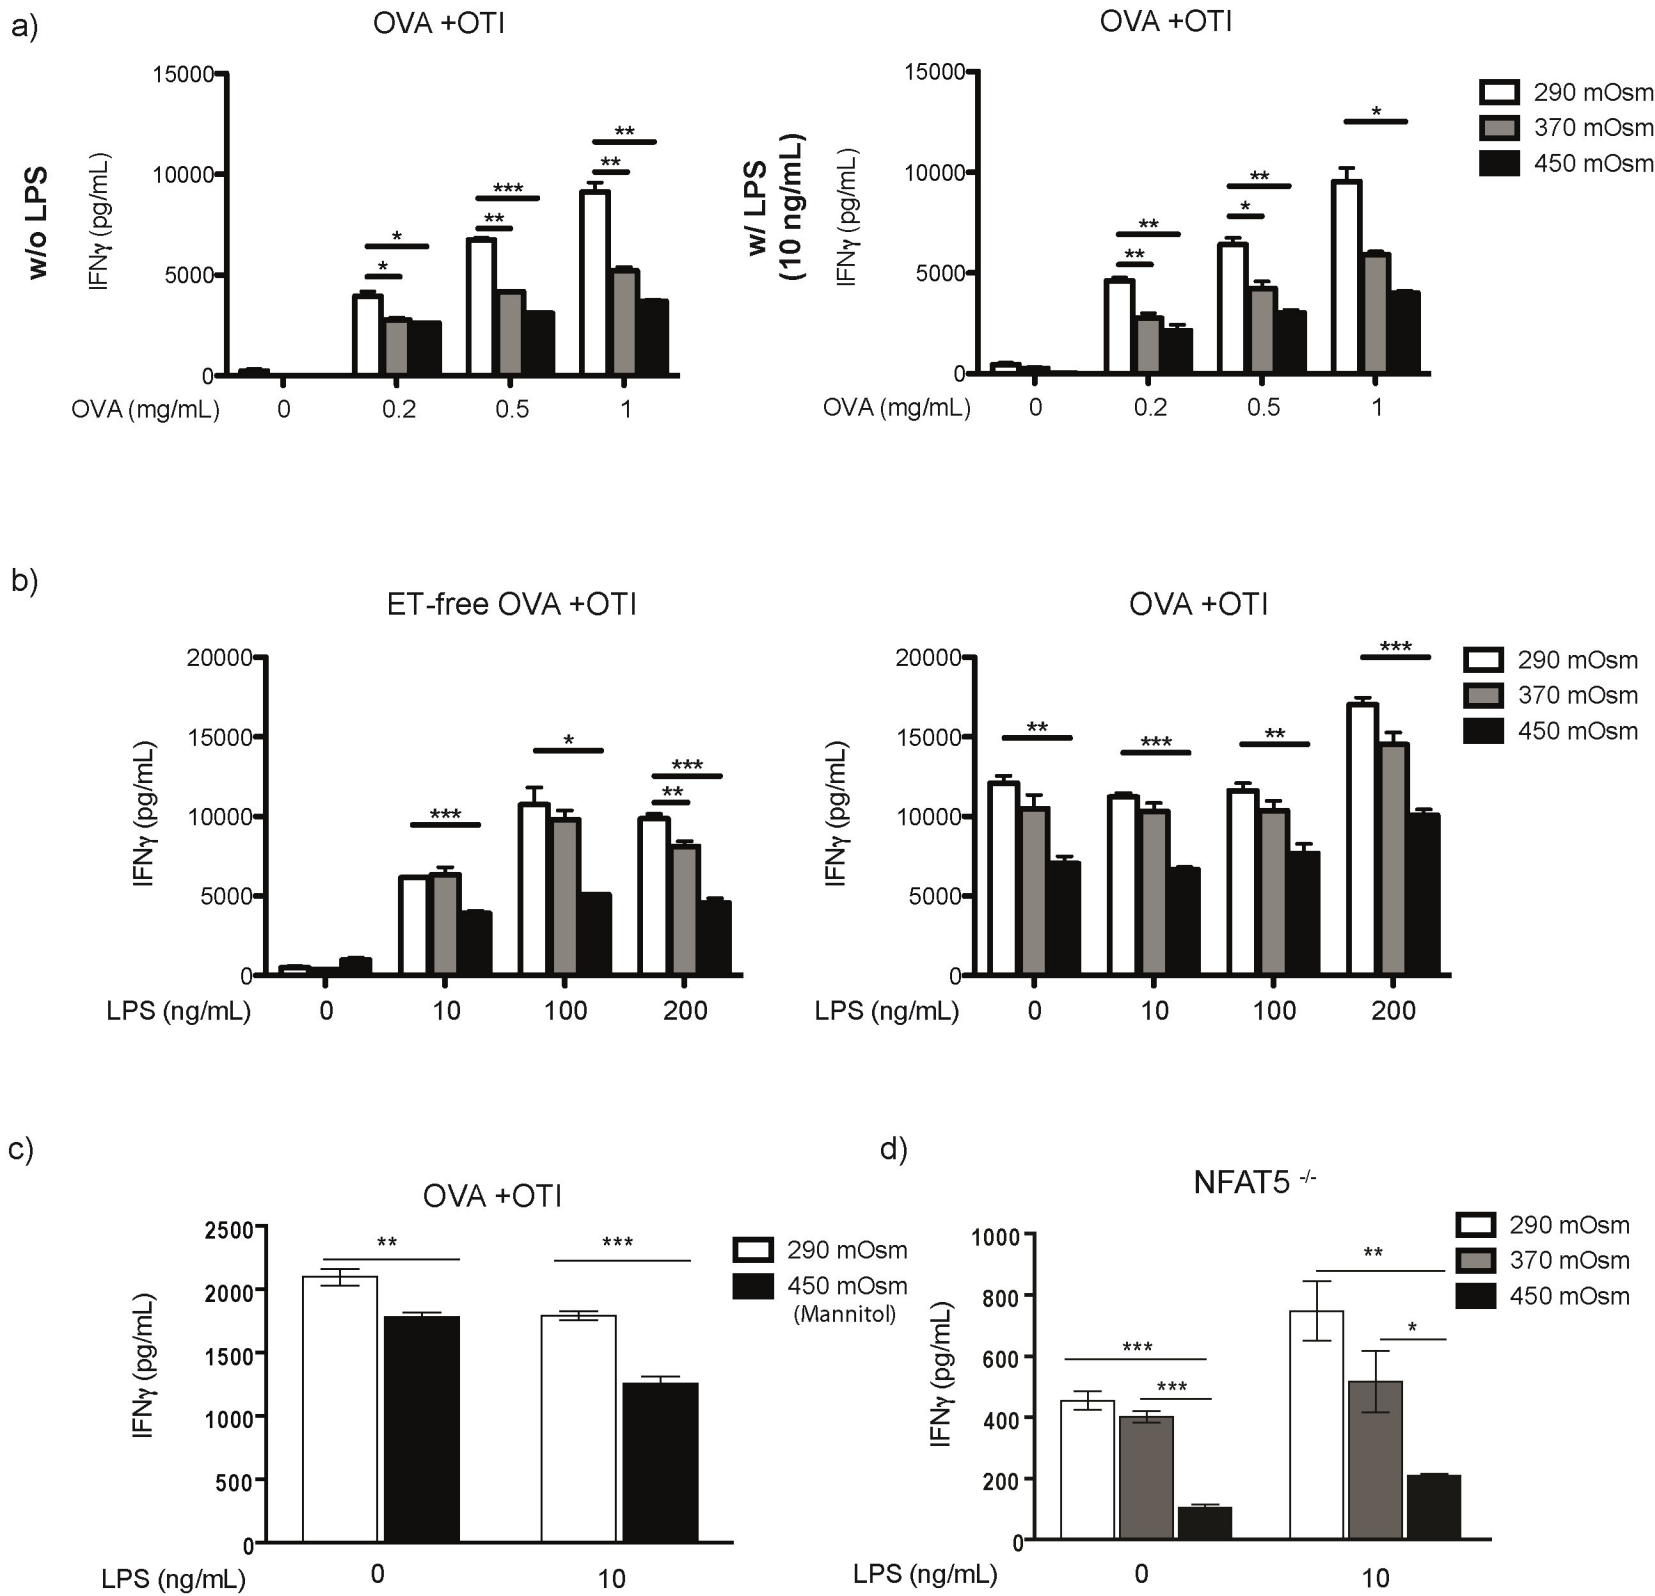



# Supplementary figure 2.

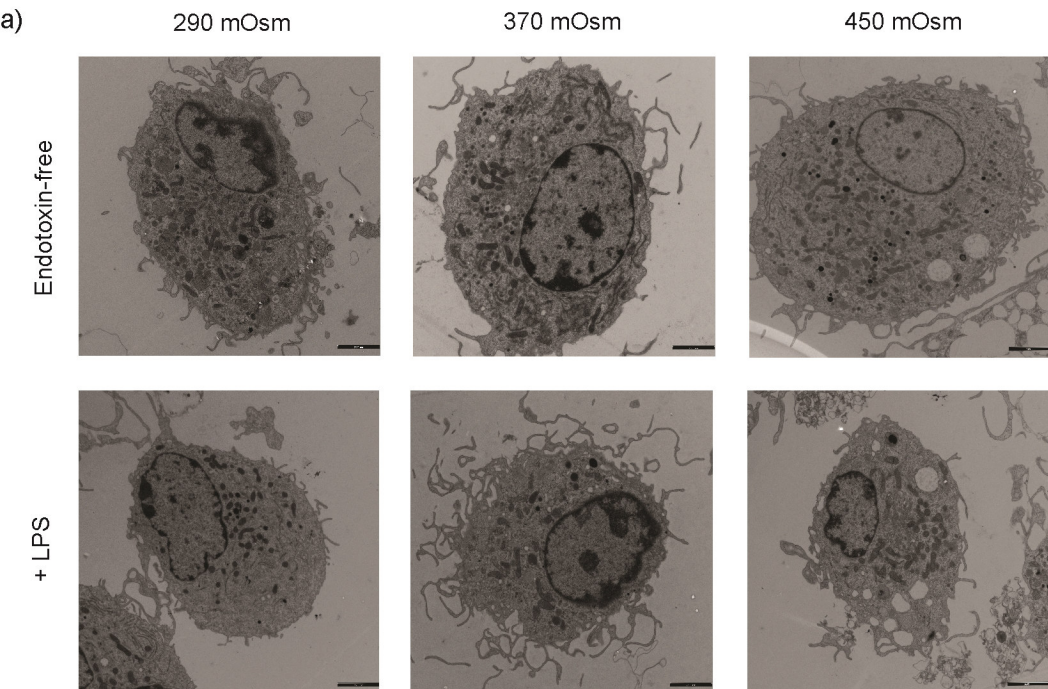

b)

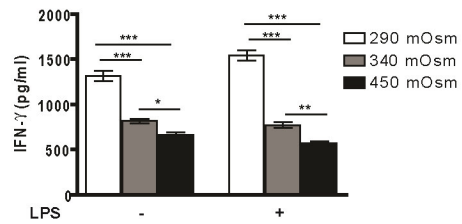

Supplemental figure 3.

a)

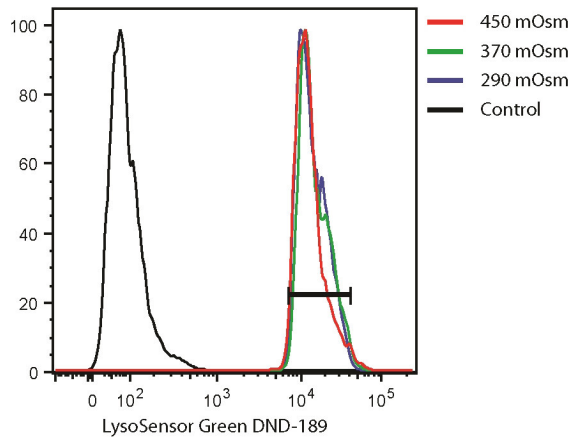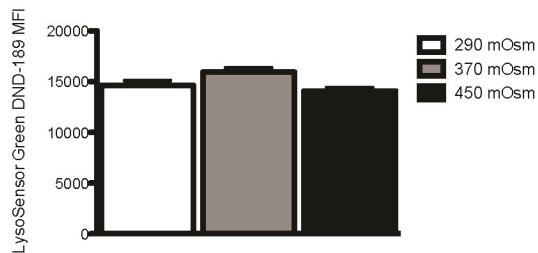

b)

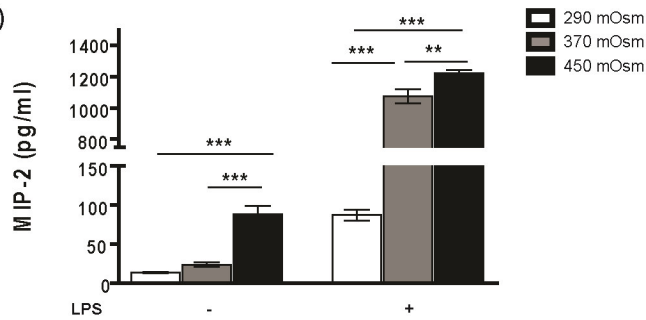

# Supplementary figure 4.

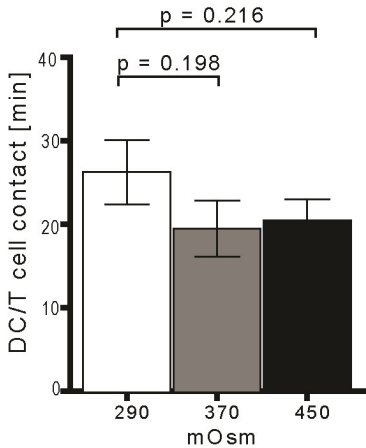

# Supplementary figure 5.

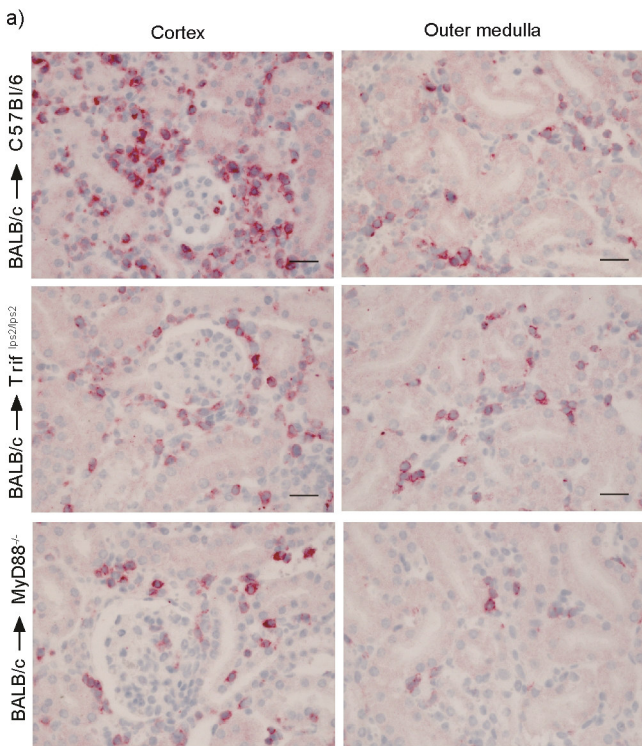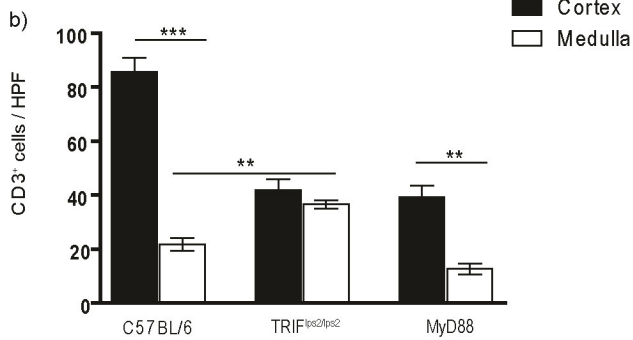



CLASS\_I\_MHC\_MEDIATED\_ANTIGEN\_PROCESSING\_PRESENTATION

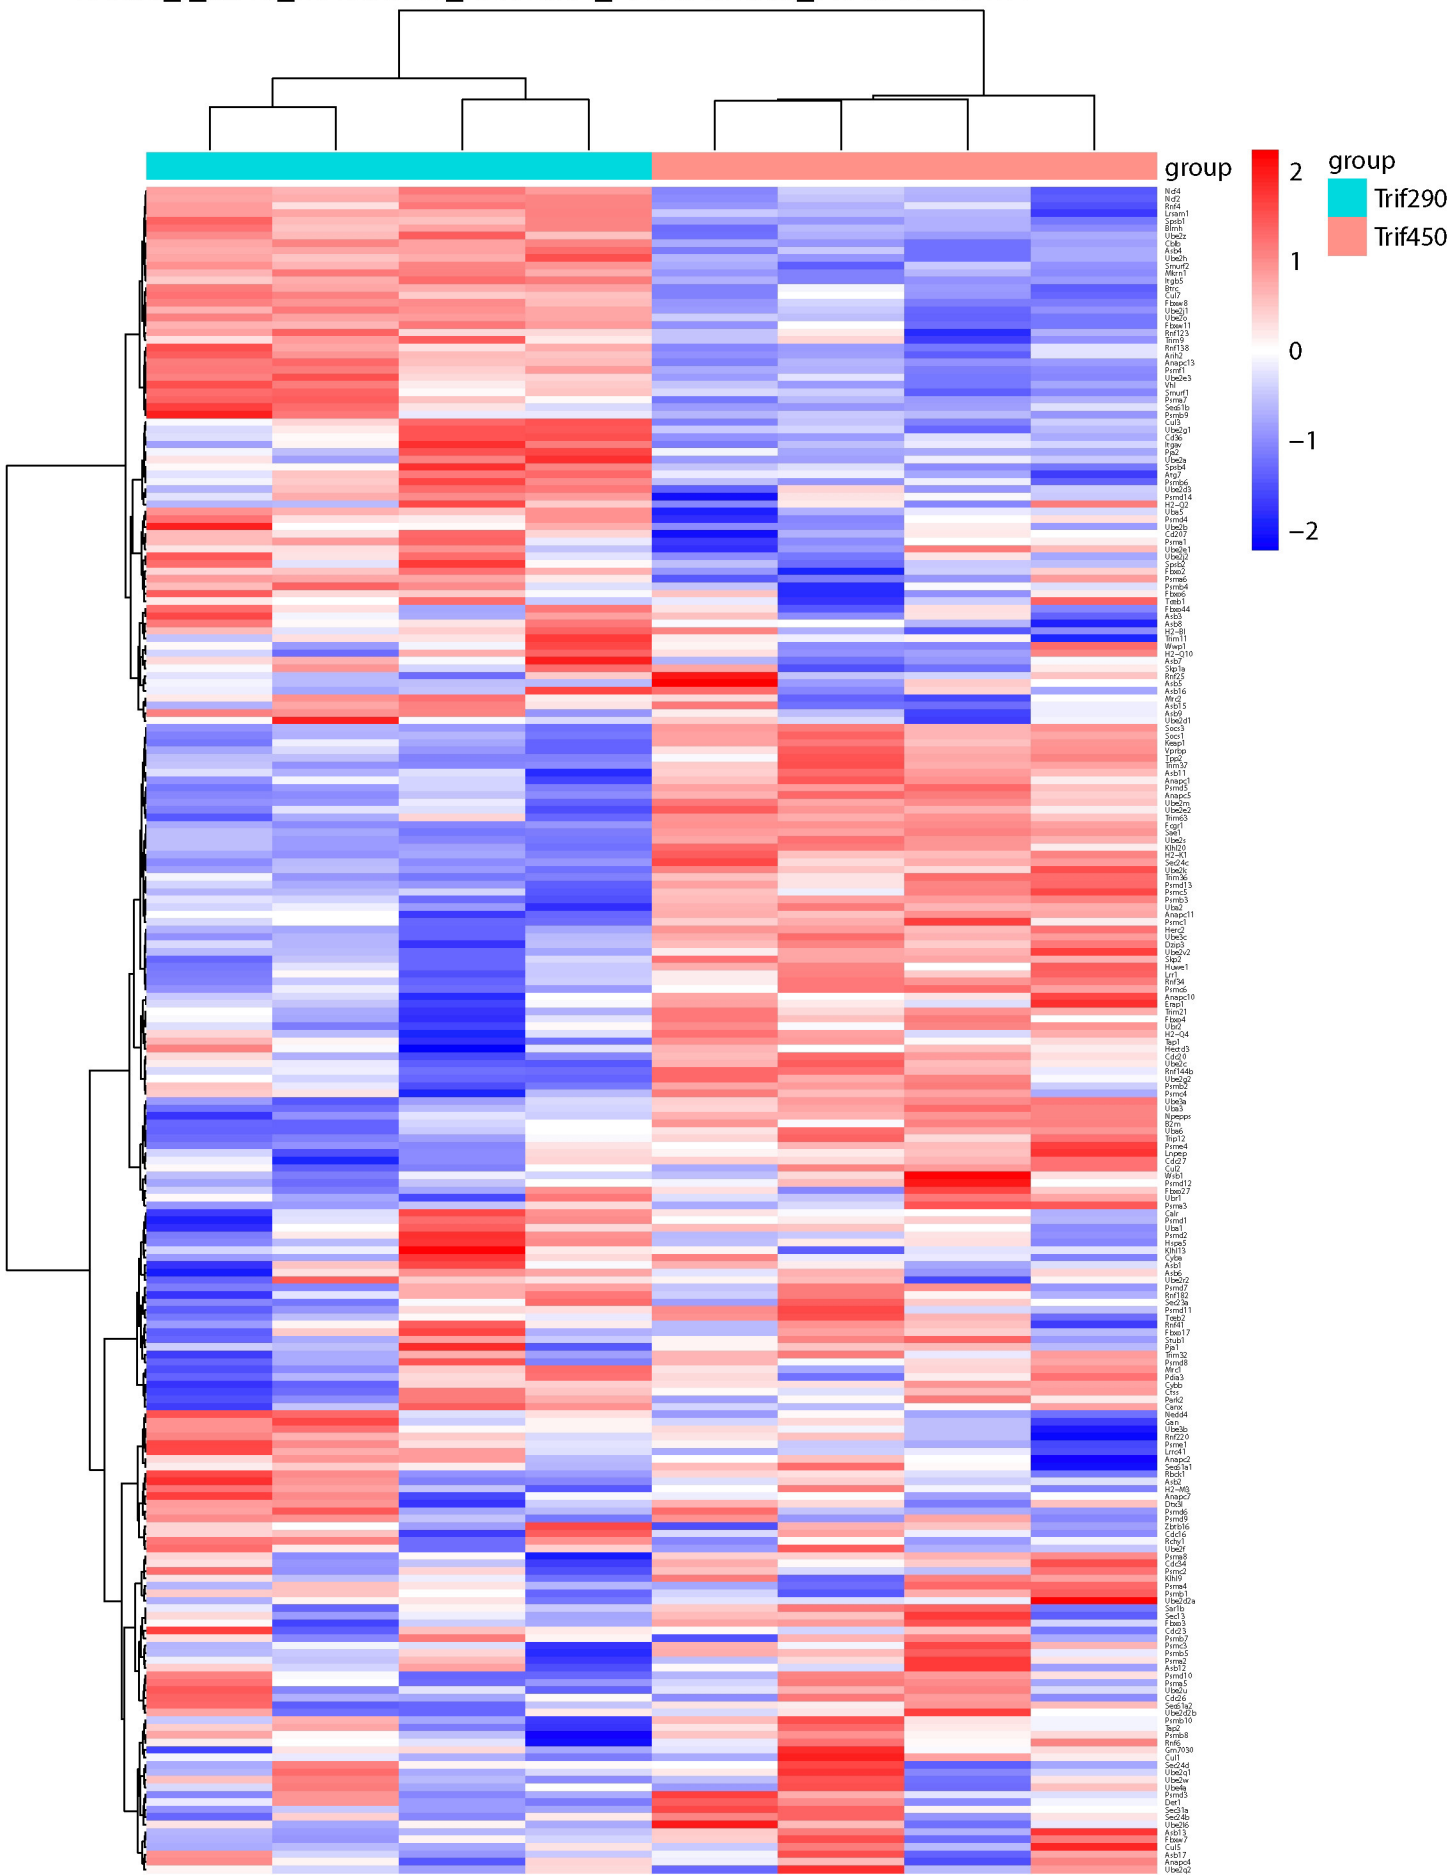

## Supplementary table 1.

a)

| Genes differentially regulated in WT(450 mOsm) vs WT (290 mOsm) |                                                              |       |              |
|-----------------------------------------------------------------|--------------------------------------------------------------|-------|--------------|
| Symbol                                                          | Gene name                                                    | logFC | adj. p value |
| Fcgr1                                                           | Fc receptor, IgG, high affinity I                            | 0.99  | 7.66E-10     |
| Socs3                                                           | suppressor of cytokine signaling 3                           | 1.35  | 4.32E-08     |
| Anapc5                                                          | anaphase-promoting complex subunit 5                         | 0.60  | 1.19E-07     |
| Sae1                                                            | SUMO1 activating enzyme subunit 1                            | 0.52  | 8.81E-07     |
| Herc2                                                           | HECT and RLD domain containing E3 ubiquitin protein ligase 2 | 0.40  | 7.22E-06     |
| Psm5                                                            | proteasome (prosome, macropain) 26S subunit, non-ATPase, 5   | 0.45  | 1.56E-05     |
| Trim37                                                          | tripartite motif-containing 37                               | 0.49  | 1.75E-05     |
| Ube2c                                                           | ubiquitin-conjugating enzyme E2C                             | 0.86  | 3.25E-05     |
| Sec24c                                                          | Sec24 related gene family, member C ( <i>S. cerevisiae</i> ) | 0.34  | 4.49E-05     |
| Socs1                                                           | suppressor of cytokine signaling 1                           | 0.60  | 6.11E-05     |
| Uba6                                                            | ubiquitin-like modifier activating enzyme 6                  | 0.42  | 8.07E-05     |
| Ube2s                                                           | ubiquitin-conjugating enzyme E2S                             | 0.33  | 0.00012      |
| Ube3c                                                           | ubiquitin protein ligase E3C                                 | 0.34  | 0.000205     |
| Rnf144b                                                         | ring finger protein 144B                                     | 0.52  | 0.000209     |
| Cdc20                                                           | cell division cycle 20                                       | 0.74  | 0.000269     |
| Anapc1                                                          | anaphase promoting complex subunit 1                         | 0.25  | 0.000322     |
| Ube3a                                                           | ubiquitin protein ligase E3A                                 | 0.36  | 0.000512     |
| Asb13                                                           | ankyrin repeat and SOCS box-containing 13                    | 0.44  | 0.000622     |
| Asb11                                                           | ankyrin repeat and SOCS box-containing 11                    | 0.42  | 0.000871     |
| Uba3                                                            | ubiquitin-like modifier activating enzyme 3                  | 0.28  | 0.000983     |
| Keap1                                                           | kelch-like ECH-associated protein 1                          | 0.26  | 0.00103      |
| Klhl20                                                          | kelch-like 20                                                | 0.32  | 0.00121      |
| Rnf34                                                           | ring finger protein 34                                       | 0.29  | 0.001575     |
| Npepps                                                          | aminopeptidase puromycin sensitive                           | 0.24  | 0.001636     |
| Trim36                                                          | tripartite motif-containing 36                               | 0.41  | 0.001837     |
| Ube2e2                                                          | ubiquitin-conjugating enzyme E2E 2                           | 0.32  | 0.001941     |
| Thpp2                                                           | tripeptidyl peptidase II                                     | 0.22  | 0.002753     |
| Sec61a1                                                         | Sec61 alpha 1 subunit ( <i>S. cerevisiae</i> )               | 0.23  | 0.003246     |
| Psm14                                                           | proteasome (prosome, macropain) 26S subunit, non-ATPase, 14  | 0.21  | 0.003979     |
| Ube2m                                                           | ubiquitin-conjugating enzyme E2M                             | 0.21  | 0.004279     |
| H2-K1                                                           | histocompatibility 2, K1, K region                           | 0.22  | 0.004286     |
| Trip12                                                          | thyroid hormone receptor interactor 12                       | 0.19  | 0.004363     |
| Ube2k                                                           | ubiquitin-conjugating enzyme E2K                             | 0.21  | 0.004584     |
| Fbxo3                                                           | F-box protein 3                                              | 0.21  | 0.004649     |
| Cdc16                                                           | CDC16 cell division cycle 16                                 | 0.19  | 0.005579     |

|         |                                                                                          |       |          |
|---------|------------------------------------------------------------------------------------------|-------|----------|
| Dzip3   | DAZ interacting protein 3, zinc finger                                                   | 0.30  | 0.007173 |
| Lrr1    | leucine rich repeat protein 1                                                            | 0.46  | 0.007279 |
| Psmb10  | proteasome (prosome, macropain) subunit, beta type 10                                    | 0.22  | 0.007946 |
| Psmb2   | proteasome (prosome, macropain) subunit, beta type 2                                     | 0.22  | 0.009438 |
| Skp2    | S-phase kinase-associated protein 2 (p45)                                                | 0.25  | 0.012214 |
| Psm12   | proteasome (prosome, macropain) 26S subunit, non-ATPase, 12                              | 0.17  | 0.013455 |
| Trim21  | tripartite motif-containing 21                                                           | 0.27  | 0.013652 |
| Sec24d  | Sec24 related gene family, member D ( <i>S. cerevisiae</i> )                             | 0.20  | 0.016178 |
| Sec31a  | Sec31 homolog A ( <i>S. cerevisiae</i> )                                                 | 0.17  | 0.019667 |
| Sec61a2 | Sec61, alpha subunit 2 ( <i>S. cerevisiae</i> )                                          | 0.36  | 0.020686 |
| Cybb    | cytochrome b-245, beta polypeptide                                                       | 0.27  | 0.02681  |
| Uba2    | ubiquitin-like modifier activating enzyme 2                                              | 0.17  | 0.029362 |
| Ube2q2  | ubiquitin-conjugating enzyme E2Q family member 2                                         | 0.18  | 0.030085 |
| Sar1b   | secretion associated Ras related GTPase 1B                                               | 0.18  | 0.030488 |
| Huwe1   | HECT, UBA and WWE domain containing 1                                                    | 0.15  | 0.032962 |
| B2m     | beta-2 microglobulin                                                                     | 0.16  | 0.035251 |
| Psm4    | proteasome (prosome, macropain) activator subunit 4                                      | 0.16  | 0.035567 |
| Fbxo4   | F-box protein 4                                                                          | 0.20  | 0.036281 |
| Rnf25   | ring finger protein 25                                                                   | 0.16  | 0.037457 |
| Rnf41   | ring finger protein 41                                                                   | 0.16  | 0.038026 |
| H2-M3   | histocompatibility 2, M region locus 3                                                   | 0.29  | 0.038432 |
| Vprbp   | Vpr (HIV-1) binding protein                                                              | 0.27  | 0.039116 |
| Ube2l6  | ubiquitin-conjugating enzyme E2L 6                                                       | 0.20  | 0.043067 |
| Det1    | de-etiolated homolog 1 ( <i>Arabidopsis</i> )                                            | 0.20  | 0.045617 |
| Psm7    | proteasome (prosome, macropain) 26S subunit, non-ATPase, 7                               | 0.17  | 0.046887 |
| Psm11   | proteasome (prosome, macropain) 26S subunit, non-ATPase, 11                              | 0.14  | 0.049382 |
| Rnf4    | ring finger protein 4                                                                    | -0.14 | 0.043094 |
| Mkrn1   | makorin, ring finger protein, 1                                                          | -0.14 | 0.04021  |
| Rnf182  | ring finger protein 182                                                                  | -0.24 | 0.040198 |
| Nedd4   | neural precursor cell expressed, developmentally down-regulated 4                        | -0.39 | 0.039612 |
| Psm4    | proteasome (prosome, macropain) subunit, beta type 4                                     | -0.15 | 0.037309 |
| Ube2z   | ubiquitin-conjugating enzyme E2Z                                                         | -0.16 | 0.017921 |
| Smurf2  | SMAD specific E3 ubiquitin protein ligase 2                                              | -0.22 | 0.01614  |
| Ncf2    | neutrophil cytosolic factor 2                                                            | -0.16 | 0.016036 |
| Psm9    | proteasome (prosome, macropain) subunit, beta type 9 (large multifunctional peptidase 2) | -0.34 | 0.012199 |
| Psm6    | proteasome (prosome, macropain) subunit, alpha type 6                                    | -0.19 | 0.011091 |
| Psm1    | proteasome (prosome, macropain) activator subunit 1 (PA28 alpha)                         | -0.22 | 0.00904  |
| Anapc7  | anaphase promoting complex subunit 7                                                     | -0.21 | 0.007511 |
| Zbtb16  | zinc finger and BTB domain containing 16                                                 | -0.38 | 0.004027 |
| Ube2b   | ubiquitin-conjugating enzyme E2B                                                         | -0.25 | 0.00223  |



|         |                                                            |       |          |
|---------|------------------------------------------------------------|-------|----------|
| Rnf138  | ring finger protein 138                                    | -0.62 | 0.001638 |
| Sec61b  | Sec61 beta subunit                                         | -0.55 | 0.001194 |
| Psm4    | proteasome (prosome, macropain) 26S subunit, non-ATPase, 4 | -0.29 | 0.000787 |
| Smurf1  | SMAD specific E3 ubiquitin protein ligase 1                | -0.47 | 0.000732 |
| Asb7    | ankyrin repeat and SOCS box-containing 7                   | -0.41 | 0.000525 |
| Ube2e3  | ubiquitin-conjugating enzyme E2E 3                         | -0.32 | 0.000456 |
| Ube2o   | ubiquitin-conjugating enzyme E2O                           | -0.32 | 0.000419 |
| Asb3    | ankyrin repeat and SOCS box-containing 3                   | -0.39 | 0.000359 |
| Ube2j1  | ubiquitin-conjugating enzyme E2J 1                         | -0.26 | 0.000358 |
| Ube2h   | ubiquitin-conjugating enzyme E2H                           | -0.39 | 0.000295 |
| Psm7    | proteasome (prosome, macropain) subunit, alpha type 7      | -0.39 | 0.00019  |
| Fbxw8   | F-box and WD-40 domain protein 8                           | -0.33 | 0.000187 |
| Btrc    | beta-transducin repeat containing protein                  | -0.32 | 0.000177 |
| Ncf4    | neutrophil cytosolic factor 4                              | -0.42 | 0.000121 |
| Lrsam1  | leucine rich repeat and sterile alpha motif containing 1   | -0.42 | 7.82E-05 |
| Blmh    | bleomycin hydrolase                                        | -0.36 | 7.38E-05 |
| Cul7    | cullin 7                                                   | -0.59 | 7.06E-05 |
| Vhl     | von Hippel-Lindau tumor suppressor                         | -0.89 | 4.35E-05 |
| Psmf1   | proteasome (prosome, macropain) inhibitor subunit 1        | -0.43 | 4.15E-05 |
| Anapc13 | anaphase promoting complex subunit 13                      | -0.40 | 2.78E-05 |
| Itgb5   | integrin beta 5                                            | -1.05 | 2.16E-06 |
| Spsb1   | splA/ryanodine receptor domain and SOCS box containing 1   | -0.94 | 1.57E-06 |
| Asb4    | ankyrin repeat and SOCS box-containing 4                   | -0.70 | 9.99E-07 |
| Cblb    | Casitas B-lineage lymphoma b                               | -1.46 | 8.82E-10 |

**b)**

| Upregulated in WT(450 mOsm) vs WT (290 mOsm), not upregulated in TRIF (450 mOsm) vs TRIF (290 mOsm) |                                                             |        |              |
|-----------------------------------------------------------------------------------------------------|-------------------------------------------------------------|--------|--------------|
| Symbol                                                                                              | Gene name                                                   | Log-FC | adj. p value |
| Anapc1                                                                                              | anaphase promoting complex subunit 1                        | 0.25   | 0.000322     |
| Asb13                                                                                               | ankyrin repeat and SOCS box-containing 13                   | 0.44   | 0.000622     |
| Rnf34                                                                                               | ring finger protein 34                                      | 0.29   | 0.001575     |
| Sec61a1                                                                                             | Sec61 alpha 1 subunit (S. cerevisiae)                       | 0.23   | 0.003246     |
| Psm14                                                                                               | proteasome (prosome, macropain) 26S subunit, non-ATPase, 14 | 0.21   | 0.003979     |
| Fbxo3                                                                                               | F-box protein 3                                             | 0.21   | 0.004649     |
| Cdc16                                                                                               | CDC16 cell division cycle 16                                | 0.19   | 0.005579     |
| Psm10                                                                                               | proteasome (prosome, macropain) subunit, beta type 10       | 0.22   | 0.007946     |
| Psm2                                                                                                | proteasome (prosome, macropain) subunit, beta type 2        | 0.22   | 0.009438     |
| Psm12                                                                                               | proteasome (prosome, macropain) 26S subunit, non-ATPase, 12 | 0.17   | 0.013455     |
| Sec24d                                                                                              | Sec24 related gene family, member D (S. cerevisiae)         | 0.20   | 0.016178     |
| Sec61a2                                                                                             | Sec61, alpha subunit 2 (S. cerevisiae)                      | 0.36   | 0.020686     |

| Cybb                                                                                       | Sec61, alpha subunit 2 ( <i>S. cerevisiae</i> )                  | 0.36   | 0.020686     |
|--------------------------------------------------------------------------------------------|------------------------------------------------------------------|--------|--------------|
| Ube2q2                                                                                     | ubiquitin-conjugating enzyme E2Q family member 2                 | 0.18   | 0.030085     |
| Sar1b                                                                                      | secretion associated Ras related GTPase 1B                       | 0.18   | 0.030488     |
| Huwe1                                                                                      | HECT, UBA and WWE domain containing 1                            | 0.15   | 0.032962     |
| Fbxo4                                                                                      | F-box protein 4                                                  | 0.20   | 0.036281     |
| Rnf25                                                                                      | ring finger protein 25                                           | 0.16   | 0.037457     |
| Rnf41                                                                                      | ring finger protein 41                                           | 0.16   | 0.038026     |
| H2-M3                                                                                      | histocompatibility 2, M region locus 3                           | 0.29   | 0.038432     |
| Ube2l6                                                                                     | ubiquitin-conjugating enzyme E2L 6                               | 0.20   | 0.043067     |
| Det1                                                                                       | de-etiolated homolog 1 ( <i>Arabidopsis</i> )                    | 0.20   | 0.045617     |
| Psm7                                                                                       | proteasome (prosome, macropain) 26S subunit, non-ATPase, 7       | 0.17   | 0.046887     |
| Psm11                                                                                      | proteasome (prosome, macropain) 26S subunit, non-ATPase, 11      | 0.14   | 0.049382     |
| <b>Downregulated in WT(450) vs WT (290), not downregulated in TRIF (450) vs TRIF (290)</b> |                                                                  |        |              |
| Symbol                                                                                     | Gene name                                                        | Log-FC | adj. p value |
| Asb3                                                                                       | ankyrin repeat and SOCS box-containing 3                         | -0.39  | 0.000359     |
| Psm4                                                                                       | proteasome (prosome, macropain) 26S subunit, non-ATPase, 4       | -0.29  | 0.000787     |
| Ube2b                                                                                      | ubiquitin-conjugating enzyme E2B                                 | -0.25  | 0.00223      |
| Zbtb16                                                                                     | zinc finger and BTB domain containing 16                         | -0.38  | 0.004027     |
| Anapc7                                                                                     | anaphase promoting complex subunit 7                             | -0.21  | 0.007511     |
| Psm1                                                                                       | proteasome (prosome, macropain) activator subunit 1 (PA28 alpha) | -0.22  | 0.00904      |
| Psm6                                                                                       | proteasome (prosome, macropain) subunit, alpha type 6            | -0.19  | 0.011091     |
| Psm4                                                                                       | proteasome (prosome, macropain) subunit, beta type 4             | -0.15  | 0.037309     |
| Rnf182                                                                                     | ring finger protein 182                                          | -0.24  | 0.040198     |
| <b>Upregulated in TRIF (450) vs TRIF (290), not upregulated in WT(450) vs WT (290)</b>     |                                                                  |        |              |
| Symbol                                                                                     | Gene name                                                        | Log-FC | adj. p value |
| Psm13                                                                                      | proteasome (prosome, macropain) 26S subunit, non-ATPase, 13      | 0.31   | 0.000444     |
| Ube2v2                                                                                     | ubiquitin-conjugating enzyme E2 variant 2                        | 0.26   | 0.007546     |
| Anapc11                                                                                    | anaphase promoting complex subunit 11                            | 0.23   | 0.012702     |
| Psm3                                                                                       | proteasome (prosome, macropain) subunit, beta type 3             | 0.20   | 0.015049     |
| Psm6                                                                                       | proteasome (prosome, macropain) 26S subunit, ATPase, 6           | 0.18   | 0.028856     |
| Psm5                                                                                       | protease (prosome, macropain) 26S subunit, ATPase 5              | 0.20   | 0.032952     |
| <b>Downregulated in TRIF (450) vs TRIF (290), not downregulated in WT(450) vs WT (290)</b> |                                                                  |        |              |
| Symbol                                                                                     | Gene name                                                        | Log-FC | adj. p value |
| Cul3                                                                                       | cullin 3                                                         | -0.21  | 0.011912     |
| Fbxw11                                                                                     | F-box and WD-40 domain protein 11                                | -0.21  | 0.013861     |
| Arih2                                                                                      | ariadne RBR E3 ubiquitin protein ligase 2                        | -0.21  | 0.018685     |
| Psm6                                                                                       | proteasome (prosome, macropain) subunit, beta type 6             | -0.23  | 0.020911     |
| Cd36                                                                                       | CD36 antigen                                                     | -0.50  | 0.032159     |
| Ube2j2                                                                                     | ubiquitin-conjugating enzyme E2J 2                               | -0.19  | 0.048786     |
